# Supplementary material for: Cytotoxic Effects of Major and Emerging Mycotoxins on HepaRG Cells and Transcriptomic Response after Exposure of Spheroids to Enniatins B and B1
Source: MDPI journal article supplement (doi:10.3390/toxins16010054), 2024-01-18

# Supplementary Materials: Cytotoxic Effects of Major and Emerging Mycotoxins on HepaRG Cells and Transcriptomic Response after Exposure of Spheroids to Enniatins B and B1

France Coulet, Monika Coton, Cristian Iperi, Marine Belinguer Podevin, Emmanuel Coton and Nolwenn Hymery

**Table S1:** Statistic alignments of Sample Control and ENN B/B1 treatments.

| Sample Name               | Total Raw Reads | Total HQ Reads | HQ Bases (Q30) | GC Content | Mean Read Length (bp) | HQ Reads % |
|---------------------------|-----------------|----------------|----------------|------------|-----------------------|------------|
| ENNB_D_IC <sub>30</sub>   | 67.9 M          | 67.07 M        | 91,0%          | 49,0%      | 150                   | 98,8%      |
| ENNB_UN_IC <sub>30</sub>  | 78.21 M         | 77.11 M        | 90,8%          | 48,8%      | 150                   | 98,6%      |
| ENNB1_D_IC <sub>0</sub>   | 87.8 M          | 86.35 M        | 90,0%          | 49,0%      | 150                   | 98,4%      |
| ENNB1_UN_IC <sub>0</sub>  | 67.24 M         | 66.59 M        | 91,8%          | 48,9%      | 149                   | 99,0%      |
| ENNB1_D_IC <sub>10</sub>  | 76.88 M         | 75.92 M        | 90,9%          | 49,1%      | 150                   | 98,8%      |
| ENNB1_UN_IC <sub>10</sub> | 72.75 M         | 72.04 M        | 91,8%          | 48,9%      | 149                   | 99,0%      |
| ENNB1_D_IC <sub>30</sub>  | 74.21 M         | 73.66 M        | 94,4%          | 49,8%      | 150                   | 99,3%      |
| ENNB1_UN_IC <sub>30</sub> | 60.05 M         | 59.3 M         | 90,1%          | 49,0%      | 149                   | 98,7%      |
| Control_D                 | 60.62 M         | 59.95 M        | 91,5%          | 48,5%      | 150                   | 98,9%      |
| Control_UN                | 65.82 M         | 65.12 M        | 91,2%          | 48,8%      | 149                   | 98,9%      |

**Table S2:** Tested mycotoxin concentrations in the different *in vitro* cell culture models. All concentrations correspond to the final mycotoxin doses added to the media, dilution included.

| Mycotoxins | Molar weight | Initial concentration (mol/L)       | Concentration range (mol/L)                                                                                                                                                                       |
|------------|--------------|-------------------------------------|---------------------------------------------------------------------------------------------------------------------------------------------------------------------------------------------------|
| DON        | 296.32       | $3.37 \times 10^{-3}$<br>(in DMSO)  | $30 \times 10^{-6}$ ; $24 \times 10^{-6}$ ;<br>$20 \times 10^{-6}$ ; $16 \times 10^{-6}$ ; $12 \times 10^{-6}$ ;<br>$8.10^{-6}$ ; $4.10^{-6}$ ; $2.10^{-6}$ ; $1.10^{-6}$ ;<br>$5 \times 10^{-7}$ |
| T-2        | 466.52       | $21.44 \times 10^{-3}$<br>(in DMSO) | $30 \times 10^{-6}$ ; $10 \times 10^{-6}$ ;<br>$5 \times 10^{-6}$ ; $1 \times 10^{-6}$ ; $5 \times 10^{-7}$ ;<br>$1 \times 10^{-7}$ ; $5.10^{-8}$ ; $1.10^{-8}$                                   |
| ZEA        | 318.36       | $6.28 \times 10^{-3}$<br>(in DMSO)  | $12.56 \times 10^{-5}$ ; $90 \times 10^{-6}$ ;<br>$75 \times 10^{-6}$ ; $60 \times 10^{-6}$ ;<br>$45 \times 10^{-6}$ ; $30 \times 10^{-6}$ ; $15 \times 10^{-6}$                                  |
| ENN B      | 639.32       | $3.13 \times 10^{-3}$<br>(in water) | $41.8 \times 10^{-6}$ ; $20.9 \times 10^{-6}$ ;<br>$10.4 \times 10^{-6}$ ; $1.04 \times 10^{-6}$ ;<br>$1.04 \times 10^{-7}$ ; $1.04 \times 10^{-8}$ ;<br>$1.04 \times 10^{-9}$                    |
| ENN B1     | 653.85       | $3.06 \times 10^{-3}$<br>(in water) | $40.8 \times 10^{-6}$ ; $20.4 \times 10^{-6}$ ;<br>$10.2 \times 10^{-6}$ ; $1.02 \times 10^{-6}$ ;<br>$1.02 \times 10^{-7}$ ; $1.02 \times 10^{-8}$ ; $1.02 \times 10^{-9}$                       |
| ENN A      | 681.9        | $2.93 \times 10^{-3}$<br>(in water) | $39 \times 10^{-6}$ ; $19.5 \times 10^{-6}$ ;<br>$9.76 \times 10^{-6}$ ; $9.76 \times 10^{-7}$ ; $9.76 \times 10^{-8}$ ;<br>$9.76 \times 10^{-9}$ ; $9.7 \times 10^{-10}$                         |
| ENN A1     | 667.87       | $0.74 \times 10^{-3}$<br>(in water) | $10 \times 10^{-6}$ ; $5 \times 10^{-6}$ ;<br>$2.5 \times 10^{-6}$ ; $2.5 \times 10^{-7}$ ; $2.5 \times 10^{-8}$ ;<br>$2.5 \times 10^{-9}$ ; $2.5 \times 10^{-10}$                                |
| BEA        | 783.95       | $2.55 \times 10^{-3}$<br>(in water) | $34.10^{-6}$ ; $17.10^{-6}$ ;<br>$8.5.10^{-6}$ ; $8.5.10^{-7}$ ; $8.5.10^{-8}$ ; $8.5.10^{-9}$                                                                                                    |

**Table S3:** Inhibitor concentration (“IC<sub>0</sub>”, “IC<sub>10</sub>” and “IC<sub>30</sub>”) used to treat spheroids for RNA-seq analysis.

| Inhibitory concentration | Mycotoxins  |            |
|--------------------------|-------------|------------|
|                          | Enniatin B1 | Enniatin B |
| Negative control         | 0           | 0          |
| IC <sub>0</sub> (μM)     | 0.1         | /          |
| IC <sub>10</sub> (μM)    | 1.37        | /          |
| IC <sub>30</sub> (μM)    | 1.96        | 520        |

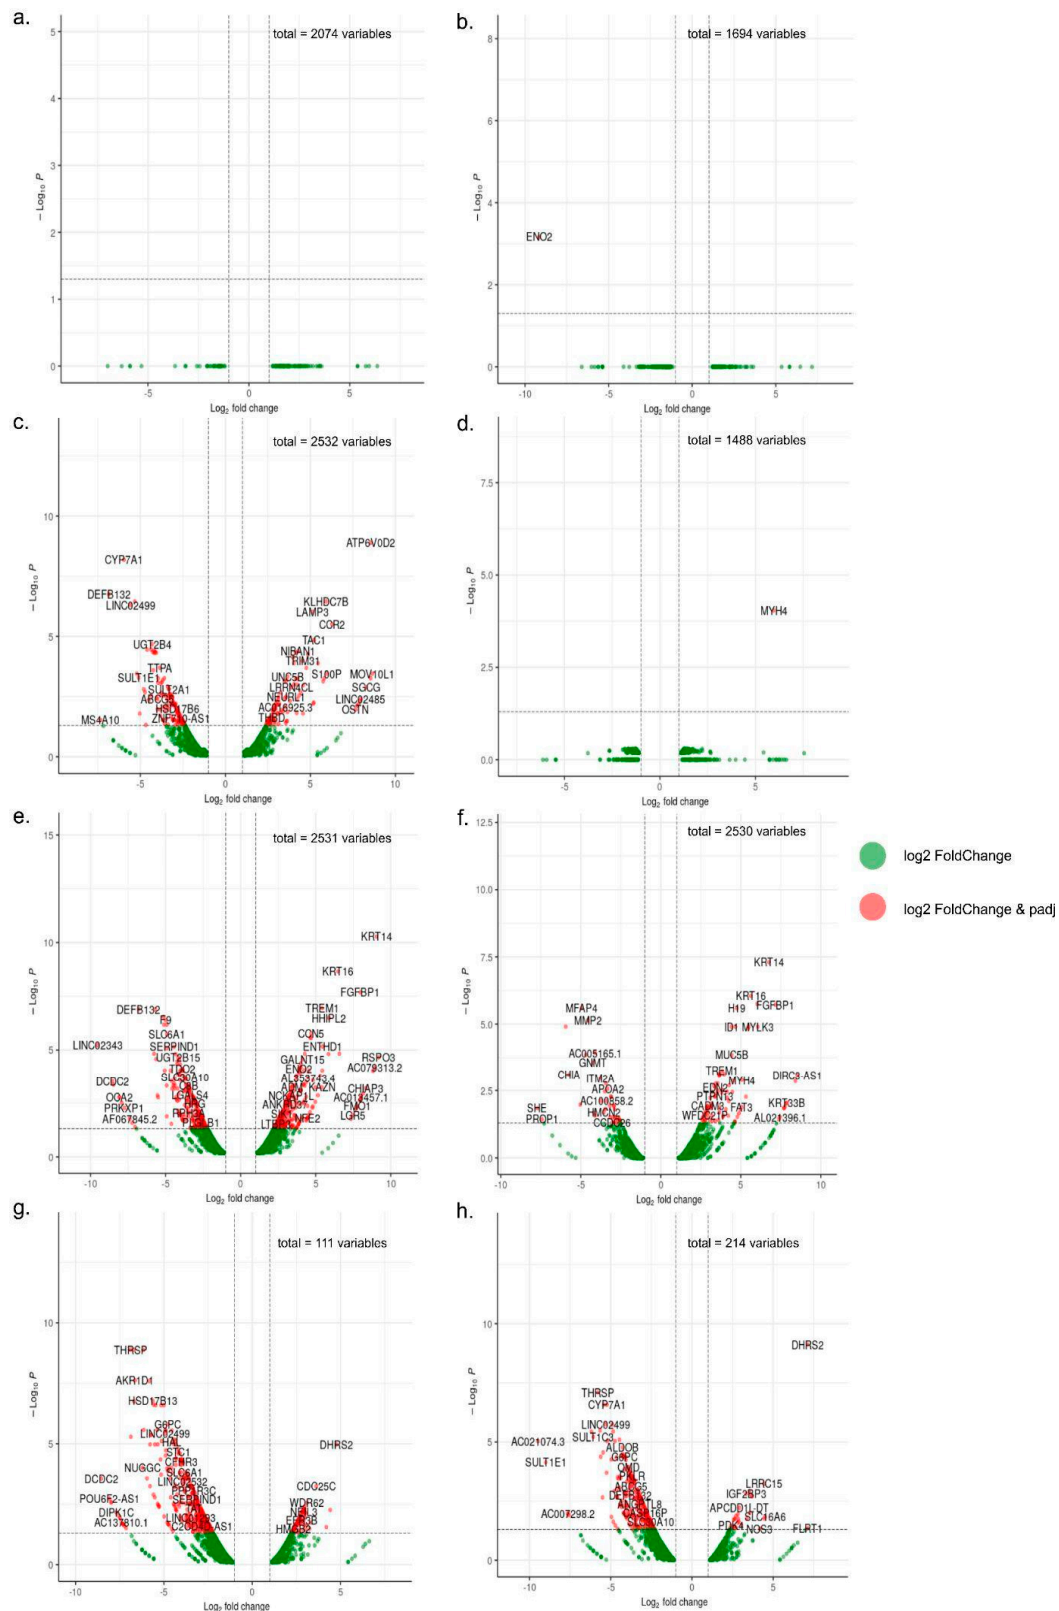

Supplement: s1 [file s1]
